# Supplementary material
Source: MDPI journal article supplement (https://www.mdpi.com/2227-9717/8/10/1212)
Supplement: s1 [file s1]

**Supplementary Materials**

Table 1. Characteristics of rootstocks: horticultural traits and tolerance grade of abiotic and biotic stress.

|  | **Carrizo citrange** | **Forner-Alcaide no.5** | **`Cleopatra mandarin´** | ***Citrus volkameriana*** |
| --- | --- | --- | --- | --- |
| **Horticultural traits** |  |  |  |  |
| Precocity | Regular | Regular | Regular | High |
| Productivity | Regular | High | Regular | High |
| Maturity | Early | Early | Regular | Early |
| Tree size | Standard | Dwarfing | Standard | Standard |
| Fruit size | Good | Good | Regular | Low |
| **Abiotic stress** |  |  |  |  |
| Salinity | Susceptible | Resistant | High | Intermediate |
| Calcareous soils | Susceptible | Intermediate | Intermediate | Resistant |
| Ponding | Susceptible | Resistant | Susceptible | Resistant |
| **Biotic stress** |  |  |  |  |
| *Phytophthora spp.* | Resistant | Resistant | Intermediate | Intermediate |
| *Citrus* nematode | Susceptible | Resistant | Susceptible | Susceptible |
| *Citrus Tristeza virus* (CTV) | Tolerant | Tolerant | Tolerant | Tolerant |

References: Martínez-Cuenca, M. R.; Primo-Capella, A.; Forner-Giner, M. A. Influence of Rootstock on Citrus Tree Growth: Effects on Photosynthesis and Carbohydrate Distribution, Plant Size, Yield, Fruit Quality, and Dwarfing Genotypes. *Plant Growth* **2016**, 107-129.

Table 2. Climatic conditions of the geographical area.

| **2016/2017** | | | | | | | | | |
| --- | --- | --- | --- | --- | --- | --- | --- | --- | --- |
| **Date** | **P (mm)** | **T max (°C)** | **T min (°C)** | **T mean (°C)** | **RH max (%)** | **RH min (%)** | **RH mean (%)** | **SR (MJ/m² day)** | **ET0 (mm)** |
| **March 2017** | 88.80 | 29.60 | -0.10 | 13.65 | 100.00 | 23.00 | 75.06 | 16.25 | 85.40 |
| **February 2017** | 64.00 | 21.50 | 1.40 | 11.88 | 100.00 | 34.00 | 83.21 | 9.53 | 43.20 |
| **January 2017** | 23.40 | 19.80 | -2.40 | 7.72 | 100.00 | 23.00 | 79.00 | 10.15 | 33.30 |
| **December 2016** | 104.60 | 19.90 | 1.50 | 10.72 | 100.00 | 47.00 | 85.97 | 8.34 | 30.30 |
| **November 2016** | 141.00 | 26.00 | 1.70 | 12.58 | 100.00 | 30.00 | 81.97 | 9.48 | 37.70 |
| **October 2016** | 121.60 | 33.70 | 8.90 | 19.51 | 99.00 | 19.00 | 72.77 | 13.72 | 77.80 |
| **September 2016** | 13.40 | 44.00 | 12.10 | 24.36 | 99.00 | 11.00 | 54.60 | 20.41 | 132.20 |
| **August 2016** | 2.40 | 39.80 | 15.90 | 28.11 | 96.00 | 9.00 | 47.48 | 24.56 | 189.90 |
| **July 2016** | 0.20 | 40.80 | 16.20 | 28.19 | 94.00 | 10.00 | 47.13 | 26.28 | 195.60 |
| **June 2016** | 0.00 | 37.60 | 11.80 | 24.84 | 96.00 | 12.00 | 49.00 | 26.96 | 181.40 |
| **May 2016** | 148.20 | 32.70 | 9.30 | 18.95 | 100.00 | 7.00 | 65.29 | 21.74 | 137.60 |
| **April 2016** | 80.60 | 28.10 | 5.40 | 16.22 | 100.00 | 18.00 | 70.73 | 17.98 | 97.30 |
| **March 2016** | 35.60 | 24.80 | 1.60 | 12.57 | 100.00 | 23.00 | 69.06 | 17.18 | 84.30 |
| **Mean** | **63.37** | **30.64** | **6.41** | **17.64** | **98.77** | **20.46** | **67.79** | **17.12** | **102.00** |
| **2017/2018** | | | | | | | | | |
| **Date** | **P (mm)** | **T max (°C)** | **T min (°C)** | **T mean (°C)** | **RH max (%)** | **RH min (%)** | **RH mean (%)** | **SR (MJ/m² day)** | **ET0 (mm)** |
| **March 2018** | 187.80 | 26.50 | 2.10 | 12.50 | 100.00 | 28.00 | 81.13 | 12.45 | 64.60 |
| **February 2018** | 36.40 | 22.40 | -3.20 | 9.29 | 100.00 | 20.00 | 70.71 | 12.00 | 46.10 |
| **January 2018** | 63.40 | 20.10 | -0.30 | 9.24 | 100.00 | 33.00 | 83.32 | 8.05 | 33.90 |
| **December 2017** | 28.00 | 20.30 | -0.80 | 9.02 | 100.00 | 29.00 | 79.06 | 8.24 | 31.00 |
| **November 2017** | 38.60 | 26.90 | 2.70 | 12.79 | 100.00 | 21.00 | 70.10 | 10.39 | 44.10 |
| **October 2017** | 22.00 | 35.50 | 9.20 | 21.22 | 100.00 | 14.00 | 60.03 | 15.19 | 91.70 |
| **September 2017** | 0.00 | 38.50 | 9.00 | 23.72 | 93.00 | 11.00 | 50.60 | 20.40 | 124.40 |
| **August 2017** | 0.80 | 43.40 | 14.50 | 27.68 | 93.00 | 8.00 | 47.39 | 24.14 | 171.70 |
| **July 2017** | 0.40 | 44.80 | 14.70 | 27.01 | 97.00 | 9.00 | 50.26 | 27.45 | 193.60 |
| **June 2017** | 0.00 | 42.00 | 14.00 | 26.85 | 99.00 | 11.00 | 48.27 | 28.24 | 193.20 |
| **May 2017** | 18.40 | 35.10 | 7.40 | 20.75 | 100.00 | 16.00 | 62.74 | 24.96 | 156.10 |
| **April 2017** | 80.60 | 31.60 | 6.50 | 17.72 | 100.00 | 15.00 | 63.53 | 22.04 | 128.30 |
| **March 2017** | 88.80 | 29.60 | -0.10 | 13.65 | 100.00 | 23.00 | 75.06 | 16.25 | 85.40 |
| **Mean** | **43.48** | **32.05** | **5.82** | **17.80** | **98.62** | **18.31** | **64.79** | **17.68** | **104.93** |

P: Precipitation. T: Temperature. RH: Relative humidity. SR: Solar radiation. ET0: Evapotranspiration.

Table S3. Fruit quality of `Salustiana´and `Sanguinelli´oranges on 4 rootstocks: Diameter, % of juice and total soluble solid (°Brix).

| **Carrizo citrange** | | | | | | | | | | | | | | | | |
| --- | --- | --- | --- | --- | --- | --- | --- | --- | --- | --- | --- | --- | --- | --- | --- | --- |
| **2016/2017** | | | | | | | | | | | | | | | | |
|  |  | **Diameter** | | | | | **% Juice** | | | | | **TSS (ºBrix)** | | | | |
|  | **Blocks** | **Dec** | **Jan** | **Feb** | **Mar** | **Apr** | **Dec** | **Jan** | **Feb** | **Mar** | **Apr** | **Dec** | **Jan** | **Feb** | **Mar** | **Apr** |
| **`Salustiana´** | I | 70.4 | 73.3 | 73.1 | 74.7 | 69.7 | 52.4 | 48.5 | 47.7 | 48.0 | 47.5 | 11.3 | 11.8 | 12.2 | 12.1 | 12.2 |
| II | 72.2 | 72.5 | 74.9 | 73.3 | 74.1 | 53.2 | 51.7 | 49.4 | 51.1 | 51.6 | 10.9 | 11.7 | 11.8 | 11.7 | 11.9 |
| III | 77.9 | 78.5 | 78.1 | 75.5 | 76.8 | 49.4 | 50.1 | 48.1 | 51.2 | 47.4 | 11.4 | 11.3 | 11.4 | 19.0 | 11.9 |
| **Mean** | ***73.5*** | ***74.8*** | ***75.3*** | ***74.5*** | ***73.5*** | ***51.7*** | ***50.1*** | ***48.4*** | ***50.1*** | ***48.9*** | ***11.2*** | ***11.6*** | ***11.8*** | ***14.3*** | ***12.0*** |
| **`Sanguinelli´** | I |  | 60.0 | 59.8 | 62.3 | 64.7 |  | 52.7 | 51.4 | 46.8 | 43.1 |  | 11.9 | 12.1 | 12.0 | 11.9 |
| II |  | 61.9 | 66.0 | 67.9 | 66.7 |  | 50.9 | 49.5 | 44.7 | 42.9 |  | 11.6 | 11.6 | 11.5 | 12.0 |
| III |  | 63.9 | 64.6 | 65.8 | 64.8 |  | 49.6 | 51.8 | 46.1 | 42.2 |  | 11.2 | 11.4 | 11.7 | 12.0 |
| **Mean** |  | ***61.9*** | ***63.4*** | ***65.3*** | ***65.4*** |  | ***51.0*** | ***50.9*** | ***45.9*** | ***42.7*** |  | ***11.6*** | ***11.7*** | ***11.7*** | ***12.0*** |
| **2017/2018** | | | | | | | | | | | | | | | | |
|  |  | **Diameter** | | | | | **% Juice** | | | | | **TSS (ºBrix)** | | | | |
|  | **Blocks** | **Dec** | **Jan** | **Feb** | **Mar** | **Apr** | **Dec** | **Jan** | **Feb** | **Mar** | **Apr** | **Dec** | **Jan** | **Feb** | **Mar** | **Apr** |
| **`Salustiana´** | I | 77.0 | 76.0 | 78.7 | 76.5 | 76.3 | 44.6 | 51.1 | 46.3 | 50.1 | 59.6 | 11.9 | 13.0 | 12.9 | 12.9 | 13.1 |
| II | 72.6 | 70.4 | 78.2 | 68.8 | 70.5 | 45.7 | 49.9 | 75.4 | 49.5 | 50.7 | 11.7 | 12.6 | 12.7 | 12.3 | 13.0 |
| III | 76.1 | 74.2 | 72.8 | 82.0 | 72.8 | 46.5 | 47.9 | 51.0 | 51.7 | 51.1 | 12.2 | 13.5 | 13.1 | 12.5 | 13.4 |
| **Mean** | ***75.2*** | ***73.5*** | ***76.6*** | ***75.8*** | ***73.2*** | ***45.6*** | ***49.6*** | ***57.6*** | ***50.4*** | ***53.8*** | ***11.9*** | ***13.0*** | ***12.9*** | ***12.5*** | ***13.2*** |
| **`Sanguinelli´** | I |  | 63.2 | 65.0 | 64.5 | 61.1 |  | 46.4 | 49.0 | 45.3 | 46.1 |  | 12.5 | 13.1 | 12.3 | 12.6 |
| II |  | 66.6 | 67.4 | 65.6 | 63.6 |  | 49.9 | 48.8 | 46.4 | 47.0 |  | 11.9 | 12.2 | 11.8 | 12.5 |
| III |  | 68.3 | 63.6 | 66.1 | 62.3 |  | 49.6 | 48.4 | 44.9 | 45.2 |  | 11.7 | 12.4 | 12.0 | 12.0 |
| **Mean** |  | ***66.0*** | ***65.3*** | ***65.4*** | ***62.3*** |  | ***48.6*** | ***48.8*** | ***45.5*** | ***46.1*** |  | ***12.0*** | ***12.6*** | ***12.0*** | ***12.4*** |
| **`Cleopatra mandarin´** | | | | | | | | | | | | | | | | |
| **2016/2017** | | | | | | | | | | | | | | | | |
|  |  | **Diameter** | | | | | **% Juice** | | | | | **TSS (ºBrix)** | | | | |
|  | **Blocks** | **Dec** | **Jan** | **Feb** | **Mar** | **Apr** | **Dec** | **Jan** | **Feb** | **Mar** | **Apr** | **Dec** | **Jan** | **Feb** | **Mar** | **Apr** |
| **`Salustiana´** | I | 69.8 | 70.4 | 71.5 | 69.1 | 69.3 | 52.0 | 51.0 | 48.9 | 44.8 | 47.6 | 10.4 | 11.5 | 11.5 | 12.0 | 12.4 |
| II | 70.0 | 71.9 | 70.0 | 71.3 | 72.7 | 54.9 | 51.2 | 53.6 | 51.3 | 49.1 | 10.4 | 11.1 | 11.4 | 11.9 | 11.9 |
| III | 71.3 | 71.0 | 71.4 | 69.9 | 70.2 | 51.9 | 46.9 | 48.1 | 44.2 | 47.4 | 10.5 | 11.9 | 11.3 | 12.0 | 12.4 |
| **Mean** | ***70.7*** | ***71.4*** | ***70.7*** | ***70.6*** | ***71.4*** | ***53.4*** | ***49.0*** | ***50.8*** | ***47.8*** | ***48.2*** | ***10.5*** | ***11.5*** | ***11.4*** | ***12.0*** | ***12.1*** |
| **`Sanguinelli´** | I |  | 59.9 | 59.8 | 60.0 | 61.1 |  | 51.1 | 49.7 | 45.7 | 40.4 |  | 11.4 | 11.7 | 12.1 | 12.3 |
| II |  | 62.0 | 58.8 | 62.7 | 63.4 |  | 53.6 | 49.0 | 47.3 | 46.6 |  | 11.1 | 12.0 | 11.9 | 12.2 |
| III |  | 61.9 | 61.6 | 62.0 | 63.1 |  | 50.9 | 50.2 | 45.3 | 39.9 |  | 10.8 | 11.5 | 11.9 | 11.8 |
| **Mean** |  | ***61.3*** | ***60.1*** | ***61.5*** | ***62.6*** |  | ***51.9*** | ***49.6*** | ***46.1*** | ***42.3*** |  | ***11.1*** | ***11.8*** | ***12.0*** | ***12.1*** |
| **2017/2018** | | | | | | | | | | | | | | | | |
|  |  | **Diameter** | | | | | **% Juice** | | | | | **TSS (ºBrix)** | | | | |
|  | **Blocks** | **Dec** | **Jan** | **Feb** | **Mar** | **Apr** | **Dec** | **Jan** | **Feb** | **Mar** | **Apr** | **Dec** | **Jan** | **Feb** | **Mar** | **Apr** |
| **`Salustiana´** | I | 73.3 | 76.0 | 76.9 | 71.8 | 72.8 | 44.7 | 47.2 | 46.5 | 51.7 | 48.9 | 12.1 | 12.8 | 12.6 | 13.5 | 13.6 |
| II | 75.4 | 74.0 | 76.8 | 79.0 | 77.0 | 46.7 | 48.2 | 48.2 | 46.0 | 46.6 | 12.1 | 13.1 | 13.2 | 12.9 | 13.5 |
| III | 80.2 | 77.6 | 80.9 | 75.1 | 76.2 | 43.7 | 47.7 | 47.8 | 49.7 | 49.9 | 12.2 | 12.7 | 12.4 | 13.9 | 13.0 |
| **Mean** | ***77.8*** | ***75.8*** | ***78.8*** | ***77.1*** | ***76.6*** | ***45.2*** | ***48.0*** | ***48.0*** | ***47.8*** | ***48.3*** | ***12.1*** | ***12.9*** | ***12.8*** | ***13.4*** | ***13.3*** |
| **`Sanguinelli´** | I |  | 63.2 | 68.2 | 63.8 | 63.0 |  | 46.4 | 45.2 | 46.6 | 44.8 |  | 12.5 | 12.5 | 12.2 | 12.7 |
| II |  | 66.6 | 66.1 | 66.8 | 64.2 |  | 49.9 | 48.9 | 43.3 | 47.8 |  | 11.9 | 12.3 | 12.0 | 12.8 |
| III |  | 68.3 | 65.0 | 64.5 | 64.4 |  | 49.6 | 46.7 | 48.7 | 48.4 |  | 11.7 | 12.3 | 12.7 | 12.7 |
| **Mean** |  | ***67.4*** | ***65.5*** | ***65.7*** | ***64.3*** |  | ***49.7*** | ***47.8*** | ***46.0*** | ***48.1*** |  | ***11.8*** | ***12.3*** | ***12.4*** | ***12.7*** |
| **Forner-Alcaide n.º 5** | | | | | | | | | | | | | | | | |
| **2016/2017** | | | | | | | | | | | | | | | | |
|  |  | **Diameter** | | | | | **% Juice** | | | | | **TSS (ºBrix)** | | | | |
|  | **Blocks** | **Dec** | **Jan** | **Feb** | **Mar** | **Apr** | **Dec** | **Jan** | **Feb** | **Mar** | **Apr** | **Dec** | **Jan** | **Feb** | **Mar** | **Apr** |
| **`Salustiana´** | I | 70.5 | 70.1 | 69.7 | 69.8 | 68.7 | 54.0 | 51.5 | 50.8 | 48.6 | 51.7 | 10.5 | 11.4 | 11.7 | 12.0 | 12.4 |
| II | 71.5 | 72.2 | 73.0 | 72.5 | 71.4 | 52.5 | 51.4 | 49.0 | 52.1 | 51.4 | 11.4 | 11.9 | 11.8 | 12.0 | 12.1 |
| III | 73.9 | 63.3 | 73.3 | 72.8 | 68.5 | 52.4 | 53.3 | 49.4 | 46.5 | 49.8 | 10.7 | 10.7 | 11.6 | 11.9 | 12.3 |
| **Mean** | ***72.0*** | ***68.5*** | ***72.0*** | ***71.7*** | ***69.5*** | ***52.9*** | ***52.1*** | ***49.7*** | ***49.1*** | ***51.0*** | ***10.9*** | ***11.3*** | ***11.7*** | ***12.0*** | ***12.3*** |
| **`Sanguinelli´** | I |  | 61.6 | 62.1 | 63.1 | 58.6 |  | 53.8 | 53.8 | 47.1 | 43.9 |  | 12.1 | 12.2 | 12.1 | 13.2 |
| II |  | 64.1 | 62.7 | 65.1 | 63.8 |  | 51.7 | 51.5 | 46.2 | 39.1 |  | 12.1 | 11.8 | 12.0 | 12.7 |
| III |  | 62.3 | 58.5 | 63.6 | 61.6 |  | 52.7 | 50.9 | 47.6 | 45.8 |  | 11.7 | 12.4 | 11.9 | 13.0 |
| **Mean** |  | ***62.7*** | ***61.1*** | ***63.9*** | ***61.3*** |  | ***52.8*** | ***52.1*** | ***47.0*** | ***43.0*** |  | ***12.0*** | ***12.1*** | ***12.0*** | ***13.0*** |
| **2017/2018** | | | | | | | | | | | | | | | | |
|  |  | **Diameter** | | | | | **% Juice** | | | | | **TSS (ºBrix)** | | | | |
|  | **Blocks** | **Dec** | **Jan** | **Feb** | **Mar** | **Apr** | **Dec** | **Jan** | **Feb** | **Mar** | **Apr** | **Dec** | **Jan** | **Feb** | **Mar** | **Apr** |
| **`Salustiana´** | I | 72.2 | 69.0 | 73.0 | 71.2 | 71.6 | 47.4 | 51.3 | 51.4 | 49.7 | 52.8 | 12.8 | 14.2 | 14.1 | 14.1 | 14.2 |
| II | 77.5 | 79.6 | 76.6 | 77.3 | 74.9 | 47.1 | 48.1 | 50.4 | 53.6 | 52.9 | 12.8 | 13.7 | 13.5 | 13.9 | 13.6 |
| III | 69.5 | 74.9 | 70.7 | 71.2 | 71.5 | 44.4 | 49.3 | 51.1 | 48.3 | 51.3 | 12.9 | 13.3 | 14.0 | 13.7 | 13.8 |
| **Mean** | ***73.5*** | ***77.2*** | ***73.7*** | ***74.3*** | ***73.2*** | ***45.7*** | ***48.7*** | ***50.7*** | ***51.0*** | ***52.1*** | ***12.8*** | ***13.5*** | ***13.8*** | ***13.8*** | ***13.7*** |
| **`Sanguinelli´** | I |  | 63.0 | 60.7 | 60.7 | 66.0 |  | 48.2 | 45.2 | 38.2 | 46.2 |  | 13.0 | 13.1 | 12.7 | 11.9 |
| II |  | 66.5 | 70.0 | 63.5 | 65.7 |  | 44.2 | 47.3 | 47.2 | 44.3 |  | 12.6 | 12.4 | 12.5 | 11.9 |
| III |  | 66.9 | 65.4 | 62.5 | 66.4 |  | 49.3 | 48.5 | 44.4 | 48.1 |  | 12.7 | 13.3 | 13.3 | 12.6 |
| **Mean** |  | ***66.7*** | ***67.7*** | ***63.0*** | ***66.1*** |  | ***46.8*** | ***47.9*** | ***45.8*** | ***46.2*** |  | ***12.7*** | ***12.9*** | ***12.9*** | ***12.3*** |
|  |  |  |  |  |  |  |  |  |  |  |  |  |  |  |  |  |
| ***Citrus volkameriana*** | | | | | | | | | | | | | | | | |
| **2016/2017** | | | | | | | | | | | | | | | | |
|  |  | **Diameter** | | | | | **% Juice** | | | | | **TSS (ºBrix)** | | | | |
|  | **Blocks** | **Dec** | **Jan** | **Feb** | **Mar** | **Apr** | **Dec** | **Jan** | **Feb** | **Mar** | **Apr** | **Dec** | **Jan** | **Feb** | **Mar** | **Apr** |
| **`Salustiana´** | I | 73.1 | 72.3 | 77.3 | 73.2 | 74.4 | 52.6 | 51.0 | 49.4 | 46.9 | 49.0 | 9.8 | 10.5 | 10.5 | 11.2 | 11.3 |
| II | 72.1 | 75.6 | 75.5 | 75.5 | 78.3 | 50.5 | 47.1 | 46.1 | 43.6 | 45.1 | 9.3 | 9.9 | 9.9 | 10.5 | 11.2 |
| III | 73.1 | 75.8 | 77.8 | 78.7 | 76.0 | 52.9 | 48.5 | 45.4 | 49.1 | 44.7 | 9.8 | 10.2 | 10.5 | 10.9 | 11.5 |
| **Mean** | ***72.8*** | ***74.5*** | ***76.9*** | ***75.8*** | ***76.2*** | ***52.0*** | ***48.9*** | ***46.9*** | ***46.5*** | ***46.3*** | ***9.6*** | ***10.2*** | ***10.3*** | ***10.9*** | ***11.3*** |
| **`Sanguinelli´** | I |  | 66.2 | 65.1 | 64.2 | 64.4 |  | 50.5 | 49.7 | 45.1 | 42.1 |  | 10.6 | 11.1 | 11.6 | 10.8 |
| II |  | 66.2 | 68.3 | 66.8 | 65.4 |  | 53.3 | 50.7 | 48.0 | 47.6 |  | 10.6 | 10.7 | 11.2 | 11.6 |
| III |  | 65.8 | 66.4 | 67.7 | 64.4 |  | 52.6 | 50.6 | 42.3 | 39.5 |  | 10.2 | 10.4 | 10.7 | 11.4 |
| **Mean** |  | ***66.1*** | ***66.6*** | ***66.2*** | ***64.7*** |  | ***52.1*** | ***50.3*** | ***45.1*** | ***43.0*** |  | ***10.4*** | ***10.8*** | ***11.2*** | ***11.3*** |
| **2017/2018** | | | | | | | | | | | | | | | | |
|  |  | **Diameter** | | | | | **% Juice** | | | | | **TSS (ºBrix)** | | | | |
|  | **Blocks** | **Dec** | **Jan** | **Feb** | **Mar** | **Apr** | **Dec** | **Jan** | **Feb** | **Mar** | **Apr** | **Dec** | **Jan** | **Feb** | **Mar** | **Apr** |
| **`Salustiana´** | I | 75.5 | 73.8 | 78.6 | 71.1 | 73.0 | 44.8 | 50.6 | 49.2 | 47.6 | 50.5 | 11.0 | 12.0 | 11.3 | 11.8 | 12.6 |
| II | 74.6 | 74.1 | 76.1 | 72.6 | 75.2 | 50.6 | 51.4 | 50.6 | 51.0 | 46.8 | 11.4 | 12.3 | 12.1 | 12.4 | 12.2 |
| III | 74.5 | 75.3 | 86.2 | 88.1 | 73.0 | 48.9 | 54.3 | 44.9 | 46.2 | 50.5 | 11.3 | 12.2 | 11.4 | 11.2 | 12.6 |
| **Mean** | ***74.6*** | ***74.7*** | ***81.2*** | ***80.4*** | ***74.1*** | ***49.8*** | ***52.8*** | ***47.7*** | ***48.6*** | ***48.6*** | ***11.3*** | ***12.3*** | ***11.8*** | ***11.8*** | ***12.4*** |
| **`Sanguinelli´** | I |  | 66.0 | 70.3 | 67.1 | 65.4 |  | 50.9 | 47.4 | 49.7 | 47.3 |  | 11.5 | 11.0 | 11.5 | 11.5 |
| II |  | 63.0 | 69.5 | 69.6 | 70.5 |  | 49.9 | 48.3 | 49.7 | 41.3 |  | 11.6 | 11.8 | 11.5 | 11.6 |
| III |  | 72.1 | 69.0 | 62.2 | 74.2 |  | 51.2 | 51.1 | 48.4 | 44.9 |  | 10.9 | 11.6 | 11.5 | 11.1 |
| **Mean** |  | ***67.5*** | ***69.3*** | ***65.9*** | ***72.4*** |  | ***50.5*** | ***49.7*** | ***49.0*** | ***43.1*** |  | ***11.2*** | ***11.7*** | ***11.5*** | ***11.4*** |

Table S4. Identification of anthocyanin compounds in `Sanguinelli ´cultivar in positive ionization mode by HPLC-HRMS.

| **RT (min)** | **Tentatively identification** | **Chemical**  **formula (M+)** | **Experimental**  **mass [m/z]+** | **δ (ppm)** | **Fragments low collision energy[m/z]+** | **MSI MI levela** |
| --- | --- | --- | --- | --- | --- | --- |
| 6.4 | Cyanidin 3-*O*-glucoside | C21H21O11+ | 449.1062 | -3.625 | 287.0534 | 1 |
| 6.5 | Cyanidin 3,5-*O*-diglucoside | C27H31O16+ | 611.1593 | -2.211 | 287.0534; 449.1062 | 2 |
| 6.9 | Cyanidin 3-*O*-rutinoside | C27H31O15+ | 595.1643 | -2.447 | 287.0535 | 2 |
| 7.1 | Peonidin 3-*O*-glucoside | C22H23O11+ | 463.1229 | -1.356 | 301.0690 | 2 |
| 7.2 | Cyanidin 3-*O*-(6"-malonyl) glucoside | C24H23O14+ | 535.1065 | -3.330 | 287.0534 | 2 |
| 7.5 | Cyanidin 3-*O*-(6"-acetyl) glucoside | C23H23O12+ | 491.1152 | -6.643 | 287.0539 | 2 |
| 7.6 | Cyanidin 3-*O*-sophoroside | C27H31O16+ | 611.1590 | -2.783 | 287.0535 | 2 |
| 7.8 | Delphinidin 3-*O*-glucoside | C21H21O12+ | 465.1022 | -0.872 | 303.0488 | 2 |

a Metabolite standards initiative (MSI) metabolite identification (MI) levels1. Reference compound was available for compound identified at MSI MI level 1.

1 Summer, L. W.; Amberg, A.; Barrett, D.; Beale, M. H.; Beger, R.; Daykin, C. A.; Fan, T. W.; Fiehn, O.; Goldagre, R.; Griffin, J. L. Proposed minimum reporting standards for chemical analysis. Chemical Analysis Working Group (CAWG) Metabolomics Standards Initiative (MSI). *Metabolomics* **2007**, *3*, 211–221
